# Supplementary material
Source: PubMed Central journal article supplement (PMC135771)
Supplement: nar_30_14_e70__2.pdf [file nar_30_14_e70__2.pdf]

Supplement 2. Sequence positions or rs numbers and minisequencing and PCR primers of the polymorphic SNPs.

| SNP      | From  | Position/rs#                  | Sequence role | Primer <sup>1</sup>                 | Sequence 5' to 3'                                                                                     | Size of PCR product (bp) | Variation |
|----------|-------|-------------------------------|---------------|-------------------------------------|-------------------------------------------------------------------------------------------------------|--------------------------|-----------|
| STAT1-e  | NCBI  | rs1400657                     | UTR           | ms primer<br>5' primer<br>3' primer | GGATACTATCCCGTGCCTGAGGTCAGAGGAGTAATAATTATTGG<br>CAGAATTGCTATGGCAGATTAAGAC<br>TGGTCGCAAGAACCAAAATAC    | 171                      | A/C       |
| STAT1-f  | NCBI  | rs1547550                     | intron        | ms primer<br>5' primer<br>3' primer | TCTCAACTTGTCTGATGGAAAGGGGGCTGGGGAGGGGAGA<br>AACATGAAGAGGCATTAAAAGGAC<br>AGTTTTAGGGAAAAGCGGAAAC        | 164                      | C/G       |
| STAT1-h  | NCBI  | rs1914408                     | intron        | ms primer<br>5' primer<br>3' primer | ATACGCTTACCAGCACATAGACCCCTGAGATGACAAATGCCT<br>GCAGCTTTATCTGCATTTCAAAC<br>CCCCTGGGAAATGTTTCAC          | 262                      | T/C       |
| STAT1-i  | NCBI  | rs908598                      | intron        | ms primer<br>5' primer<br>3' primer | GCGGCGGTTGACATAAATTTCCACCAAAATAACTACC<br>GTGGTGACAAACAAAGCCAAC<br>TAAACTCCCCTCCCTCCAC                 | 213                      | A/G       |
| STAT1-j  | NCBI  | rs952798                      | intron        | ms primer<br>5' primer<br>3' primer | GCCGACGCTTCGACAGAAATTAATAAGGAAACCTTGCAAGTG<br>AAAGCAAAAAGTGGACCCATAC<br>GCCCTATACAGCACAGATCTAC        | 273                      | C/T       |
| STAT3-13 | NCBI  | AC# NT_010771:945807,rs744166 | UTR           | ms primer<br>5' primer<br>3' primer | ATTCGGCGGCTCACAAATGTTCTATAAAATTACTGTCA<br>GAAAAGGAGGAGTAAGTGACAAAC<br>AGGGATGGCAGGTTTTAC              | 334                      | A/G       |
| STAT3-14 | NCBI  | rs1026916                     | intron        | ms primer<br>5' primer<br>3' primer | ATTCGAGAACTTGCATCAAAAAGTTAACCCAAAGACTGT<br>AAAACGGAGTCTAGAACTGAATGAC<br>CATAGATCCACGGACGTTTAC         | 277                      | A/G       |
| IFNAR1-e | BLAST | AC# X60459:19185              | exon          | ms primer<br>5' primer<br>3' primer | GGATAGTTCCTACGTGTGGAAGATTTTCCAGATAA<br>GTGATACCATCTCTCCTCGAAC<br>AATTCGCCTAAATTTTCTCTCAC              | 206                      | C/G       |
| IFNAR1-t | NCBI  | rs914141                      | intron        | ms primer<br>5' primer<br>3' primer | CCTGCACGTTAGAACACTGGTAATAATTTCCTTAATGTATT<br>CATGAACTACATGAAATCAAAAAGTAGAC<br>CCTTACCAGTCAACACTAGAAAC | 325                      | G/T       |
| IFNAR1-u | NCBI  | rs914142                      | intron        | ms primer<br>5' primer<br>3' primer | CTCGGGCTTATAGATCAGCTTGTGTGGACTCAGTGCT<br>GCCTATGGTTGCTGGGAC<br>CAAATGCCTTAACAGTGTGAC                  | 164                      | A/G       |
| IFNAR1-v | NCBI  | rs1041867                     | intron        | ms primer<br>5' primer<br>3' primer | CCCTCGTGGAGATCGAATACCAATAATTTCTCAATTGTGCT<br>GAGTTAAACCATAAAGAACCTTACCAC<br>GAAGAACACGGGAAAAGGAC      | 317                      | G/T       |
| IFNAR1-w | NCBI  | rs1041868                     | intron        | ms primer<br>5' primer<br>3' primer | CGCCAGCTTAGAGCGAAATTCATGATCCAGAGTCCGGCCC<br>GAGTTAAACCATAAAGAACCTTACCAC<br>GAAGAACACGGGAAAAGGAC       | 317                      | A/G       |
| IFNAR2-g | BLAST | AC# L41944:27                 | UTR           | ms primer<br>5' primer<br>3' primer | ACTCGTCGGATGCAATGATCCGCCGGGGGATTCCTACCC<br>CGCACCCGCCTAAAAGAC<br>GGCTGCGCTCGGGGAAAC                   | 123                      | G/T       |
| IFNAR2-k | NCBI  | rs1051393                     | exon          | ms primer<br>5' primer              | CCATATCTTACACAGCAGGTTGAGCCAGAAATGCCTTCATC<br>TTTCAGATGTAAAAGTCAAGAGAAAGAC                             | 233                      | G/T       |

|          |        |                            |  |                              |  |                                                          |     |  |     |
|----------|--------|----------------------------|--|------------------------------|--|----------------------------------------------------------|-----|--|-----|
| IFNAR2-m | NCBI   | rs3153                     |  | intron                       |  | 3' primer<br>AGGAAATGAGTTTGGCAG                          |     |  |     |
|          |        |                            |  |                              |  | ms primer<br>CGTCACGTTACCTACATGATGACCTGACCTCTGACATGTGG   | 149 |  | T/C |
|          |        |                            |  |                              |  | 5' primer<br>ACTGAGTGTTCCTGCAGATATAAAC                   |     |  |     |
|          |        |                            |  |                              |  | 3' primer<br>TTATATTTGAACACCTGACCTGAC                    |     |  |     |
| IFI27    | HGBASE | AC#: X67325:485, rs2799    |  | UTR                          |  | ms primer<br>CTTAACTATTAGCGTCGGTGGAGAAAGGCACCCAGCCCATC   | 197 |  | C/G |
|          |        |                            |  |                              |  | 5' primer<br>GCTGTCATTGCGAGGTTCTAC                       |     |  |     |
|          |        |                            |  |                              |  | 3' primer<br>GGAGATGCAGAAATTTGGTATATTTTCAC               |     |  |     |
| IRF5-b   | NCBI   | rs1874328                  |  | intron, MIR repeat           |  | ms primer<br>AAACGACGTAGGCCGGACATTTGGCCATTCAAAAATAATACCA | 428 |  | A/G |
|          |        |                            |  |                              |  | 5' primer<br>ATGTTGGTAAACCTCACCTCAC                      |     |  |     |
|          |        |                            |  |                              |  | 3' primer<br>TCGCACCTGTAATCCCAAC                         |     |  |     |
| IRF5-e   | NCBI   | rs2402939                  |  | intron                       |  | ms primer<br>CGTCCGCTAGCTGGATCAAGCCTGGAAAGCGAGCTCGGG     | 158 |  | G/T |
|          |        |                            |  |                              |  | 5' primer<br>GCGGGATGAAGACTGGAGTA                        |     |  |     |
|          |        |                            |  |                              |  | 3' primer<br>GGAGCGCCTTTGGAAATC                          |     |  |     |
| IFNA21-a | NCBI   | rs2939                     |  | UTR                          |  | ms primer<br>CAACGGGTGGACTCTGCAATATAGAACTGTGGACTGGTGT    | 559 |  | G/A |
|          |        |                            |  |                              |  | 5' primer<br>GCCAGAAGTCATAGAAAGTGTGGAC                   |     |  |     |
|          |        |                            |  |                              |  | 3' primer<br>CTGGCACAAAATGGGAAGAAT                       |     |  |     |
| IFNA21-b | NCBI   | rs1053887                  |  | exon                         |  | ms primer<br>AGTAGTCCGAAAGGCTCCTATTTCTGCTCTGCAAACTCCCA   | 559 |  | G/A |
|          |        |                            |  |                              |  | 5' primer<br>GGCAGAAGTCATAGAAAGTGTGGAC                   |     |  |     |
|          |        |                            |  |                              |  | 3' primer<br>CTGGCACAAAATGGGAAGAAT                       |     |  |     |
| JAK1-d   | BLAST  | AC#: M64174:2238           |  | exon                         |  | ms primer<br>GTCCTCGCTTCGCTATGAGATCGACAGTGTGGGCCCC       | 195 |  | A/G |
|          |        |                            |  |                              |  | 5' primer<br>ACTCTGCAGGAGGATAAAGAC                       |     |  |     |
|          |        |                            |  |                              |  | 3' primer<br>GAGACACACCTTGCCTAGAC                        |     |  |     |
| TYK2-g   | BLAST  | AC# X54637:1390, rs2304256 |  | exon                         |  | ms primer<br>TATTAAGGTTGTACCCCTCGAAAGGCCAAGGCTCACAAAGGCA | 296 |  | T/G |
|          |        |                            |  |                              |  | 5' primer<br>GGAAAGTGCAGGAGGTATAAAC                      |     |  |     |
|          |        |                            |  |                              |  | 3' primer<br>CTGCCGGTGGATGCTGAC                          |     |  |     |
| TYK2-h   | BLAST  | AC# X54637:2357            |  | intron, exon-intron boundary |  | ms primer<br>GTTACGAATTATGGCTGTGGCAGCTGTGCTTTTACAGATA    | 246 |  | G/T |
|          |        |                            |  |                              |  | 5' primer<br>GCATTTCTCTCCTCCCAAC                         |     |  |     |
|          |        |                            |  |                              |  | 3' primer<br>TGCTCCACGFACTCTGTAC                         |     |  |     |
| TYK2-m   | BLAST  | AC# X54637:175, rs280500   |  | UTR                          |  | ms primer<br>GTAACGCTTGGACGTAGATTGTAATGAAAACATTACAACCATC | 236 |  | T/C |
|          |        |                            |  |                              |  | 5' primer<br>TGCGGAACCTATATTGAAAACATTAC                  |     |  |     |
|          |        |                            |  |                              |  | 3' primer<br>ACACACCTCCCAAAAATAAC                        |     |  |     |
| TYK2-n   | BLAST  | AC# X54637:822, rs280523   |  | exon                         |  | ms primer<br>CTAAGCCATTAGCGGACATTATCACTGTGGGAGCTGTCCGAC  | 361 |  | C/T |
|          |        |                            |  |                              |  | 5' primer<br>ACCTCTGGGCTAGAGAGGAAC                       |     |  |     |
|          |        |                            |  |                              |  | 3' primer<br>CGGCAATATGCAAAAGTCTAC                       |     |  |     |

<sup>1</sup>PCR primers contained the universal sequences TTC TAA TAC GAC TCA CTA TAG or TTC TAA TAC GAC TCA CTA TAG GGA GA in the 5' end of the forward primers and GCG GTC CCA AAA GGG TCA GT in the 5' end of the reverse primer.
